# Supplementary material for: The Cancer Loneliness Scale and Cancer-related Negative Social Expectations Scale: development and validation
Source: Springer Nature journal article supplement (doi:10.1007/s11136-017-1518-4), 2017-02-24
Supplement: MOESM1 [file 12092114]

**Electronic Supporting Information**

The Cancer Loneliness Scale and Cancer-related Negative Social Expectations Scale: Development and Validation

Quality of Life Research

Rebecca N. Adams, Ph.D, Catherine E. Mosher, Ph.D.,Kevin L. Rand, Ph.D., Adam T. Hirsh, Ph.D., Patrick O. Monahan, Ph.D., Rafat Abonour, M.D., and Kurt Kroenke, M.D.

Correspondence concerning this article should be addressed to Rebecca N. Adams, Ph.D., Department of Pediatrics, Stanford University School of Medicine, 780 Welch Road, MC 5776, Palo Alto, CA 94304. Phone: 1-650-736-1567. Fax: 1-650-736-6690. Email: rnadams@stanford.edu.

*Online Resource 1: Inter-item Correlations for the Cancer Loneliness Scale Item Pool*

|  | 1 | 2 | 3 | 4 | 5 | 6 | 7 | 8 | 9 | 10 | 11 | 12 | 13 | 14 | 15 |
| --- | --- | --- | --- | --- | --- | --- | --- | --- | --- | --- | --- | --- | --- | --- | --- |
| 1. | *—* |  |  |  |  |  |  |  |  |  |  |  |  |  |  |
| 2. | 0.60 | *—* |  |  |  |  |  |  |  |  |  |  |  |  |  |
| 3. | 0.67 | 0.65 | *—* |  |  |  |  |  |  |  |  |  |  |  |  |
| 4. | 0.71 | 0.57 | 0.71 | *—* |  |  |  |  |  |  |  |  |  |  |  |
| 5. | 0.58 | 0.70 | 0.63 | 0.52 | *—* |  |  |  |  |  |  |  |  |  |  |
| 6. | 0.70 | 0.67 | 0.73 | 0.76 | 0.66 | *—* |  |  |  |  |  |  |  |  |  |
| 7. | 0.64 | 0.57 | 0.69 | 0.73 | 0.60 | 0.74 | *—* |  |  |  |  |  |  |  |  |
| 8. | 0.57 | 0.55 | 0.63 | 0.60 | 0.62 | 0.63 | 0.58 | *—* |  |  |  |  |  |  |  |
| 9. | 0.67 | 0.56 | 0.70 | 0.74 | 0.61 | 0.77 | 0.66 | 0.65 | *—* |  |  |  |  |  |  |
| 10. | 0.65 | 0.60 | 0.80 | 0.75 | 0.57 | 0.74 | 0.66 | 0.60 | 0.72 | *—* |  |  |  |  |  |
| 11. | 0.70 | 0.60 | 0.65 | 0.65 | 0.76 | 0.72 | 0.63 | 0.55 | 0.68 | 0.68 | *—* |  |  |  |  |
| 12. | 0.68 | 0.59 | 0.67 | 0.76 | 0.68 | 0.78 | 0.73 | 0.67 | 0.74 | 0.71 | 0.71 | *—* |  |  |  |
| 13. | 0.64 | 0.58 | 0.66 | 0.59 | 0.79 | 0.67 | 0.63 | 0.62 | 0.67 | 0.65 | 0.80 | 0.70 | *—* |  |  |
| 14. | 0.73 | 0.69 | 0.71 | 0.66 | 0.75 | 0.74 | 0.61 | 0.64 | 0.72 | 0.71 | 0.81 | 0.73 | 0.77 | *—* |  |
| 15. | 0.70 | 0.62 | 0.71 | 0.65 | 0.66 | 0.66 | 0.69 | 0.58 | 0.65 | 0.69 | 0.76 | 0.63 | 0.66 | 0.75 | *—* |

*Note.* All *ns*=185. All *p-values*<0.01.

*Online Resource 2: Inter-item Correlations for the Cancer-related Negative Social Expectations Scale*

|  | 1. | 2. | 3. | 4. | 5. | 6. | 7. | 8. | 9. | 10. | 11. | 12. | 13. | 14. |
| --- | --- | --- | --- | --- | --- | --- | --- | --- | --- | --- | --- | --- | --- | --- |
| 1. | *—* |  |  |  |  |  |  |  |  |  |  |  |  |  |
| 2. | 0.44** | — |  |  |  |  |  |  |  |  |  |  |  |  |
| 3. | 0.45** | 0.61** | *—* |  |  |  |  |  |  |  |  |  |  |  |
| 4. | 0.43** | 0.70** | 0.70** | *—* |  |  |  |  |  |  |  |  |  |  |
| 5. | 0.13 | 0.01 | 0.06 | 0.00 | *—* |  |  |  |  |  |  |  |  |  |
| 6. | 0.43** | 0.63** | 0.68** | 0.67** | 0.10 | *—* |  |  |  |  |  |  |  |  |
| 7. | 0.46** | 0.43** | 0.42** | 0.49** | 0.12 | 0.62** | *—* |  |  |  |  |  |  |  |
| 8. | 0.44** | 0.61** | 0.57** | 0.67** | 0.16* | 0.60** | 0.56** | *—* |  |  |  |  |  |  |
| 9. | 0.40** | 0.61** | 0.65** | 0.70** | 0.07 | 0.72** | 0.61** | 0.69** | *—* |  |  |  |  |  |
| 10. | 0.42** | 0.64** | 0.61** | 0.70** | 0.14 | 0.66** | 0.55** | 0.72** | 0.69** | *—* |  |  |  |  |
| 11. | 0.33** | 0.15* | 0.04 | 0.08 | 0.33** | 0.18* | 0.26** | 0.20** | 0.10 | 0.21** | — |  |  |  |
| 12. | 0.31** | 0.50** | 0.48** | 0.48** | 0.12 | 0.51** | 0.40** | 0.45** | 0.50** | 0.41** | 0.14* | *—* |  |  |
| 13. | 0.42** | 0.46** | 0.37** | 0.46** | 0.11 | 0.53** | 0.58** | 0.51** | 0.45** | 0.53** | 0.45** | 0.40** | *—* |  |
| 14. | 0.37** | 0.48** | 0.45** | 0.52** | 0.06 | 0.58** | 0.45** | 0.54** | 0.50** | 0.54** | 0.22** | 0.46** | 0.52** | *—* |

*Note.* *Ns*=185-186.

**p*<0.05.

***p*<0.01.
